# Supplementary material for: Nanoscopic subcellular imaging enabled by ion beam tomography
Source: PubMed Central journal article supplement (PMC7862654; doi:10.1038/s41467-020-20753-5), 2021-02-04
Supplement: 41467_2020_20753_MOESM2_ESM.pdf [file 41467_2020_20753_MOESM2_ESM.pdf]

**Editorial Note:** This manuscript has been previously reviewed at another journal that is not operating a transparent peer review scheme. For versions considered at *Nature Communications*, the reviewer(s) submitted confidential comments to the editor which have not been included here.
