# Supplementary material for: Nanoscopic subcellular imaging enabled by ion beam tomography
Source: PubMed Central journal article supplement (PMC7862654; doi:10.1038/s41467-020-20753-5), 2021-02-04
Supplement: 41467_2020_20753_MOESM3_ESM.pdf [file 41467_2020_20753_MOESM3_ESM.pdf]

## **Description of Additional Supplementary Files**

**Supplementary Movie 1.** 3D IBT reconstruction of a Nalm6 cell treated with Transcription (81Br-rU) and Replication(127I-dU) for 30 min. 3D visuals for the cell that was shown in Figure 2.

**Supplementary Movie 2.** 3D IBT reconstruction for DNA in a HeLa cell treated with two-colour replication with 127I-dU and 81Br-dU for 24-hours. Only 3D DNA features from 127I-dU were demonstrated. 3D HeLa cell corresponds to - Figure 3.

**Supplementary Movie 3.** 3D IBT reconstruction for DNA in a HeLa cell treated with two-colour replication with 127I-dU and 81Br-dU for 24-hours. Only 3D DNA features from 81Br-dU were demonstrated. 3D HeLa cell corresponds to Supplementary Figure 30a.

**Supplementary Movie 4.** 3D IBT reconstruction of a Nalm6 cell treated with 127I-dU and 81Br-dU that was separated by a 30-min chase. The 3D cell patterns correspond to the images that were shown in Figure 4a and b1.

**Supplementary Movie 5.** 3D IBT visual for replicated DNA patterns that were labelled with 127I-dU and 81Br-dU with a separation of 2-h Chase. 3D Nalm6 cell for the data that was shown in Figure 4b5 and Supplementary Figure 31.

**Supplementary Movie 6.** 3D IBT representation of a Nalm6 cell that was treated with Transcription (81Br-rU) and Replication(127I-dU) for 2-h. 3D cell data corresponds to Figure 5a2 and Supplementary Figure 38.

**Supplementary Movie 7.** 3D IBT visual of a Nalm6 cell that was incubated with Transcription (81Br-rU) and Replication(127I-dU together with  $\alpha$ -Aminitin transcriptional inhibitor for 30 mins. The cell denotes the images that were shown in Supplementary Figure 39.

**Supplementary Movie 8.** 3D DNA reconstruction by IBT pipeline for a Nalm6 cell that was treated with two-colour replication with 127I-dU and 81Br-dU for 24-hours. The 3D cell denotes the images that were presented in Supplementary Figure 19.

**Supplementary Movie 9.** 3D IBT visual for a DNA reconstruction for two-colour replication that was treated with 127I-dU and 81Br-dU that was separated by a 30-min chase. The cell tomograms correspond to Supplementary Figure 32.

**Supplementary Movie 10.** 3D IBT visual for a DNA reconstruction for two-colour replication that was treated with 127I-dU and 81Br-dU that was separated by a 2-h chase. The 3D cell images correspond to Supplementary Figure 33.

**Supplementary Movie 11.** 3D IBT reconstruction for a Nalm6 cell that was incubated with Transcription (81Br-rU) and Replication(127I-dU) for 30-minutes. The 3D cell data was obtained from Supplementary Figure 36.

**Supplementary Movie 12.** 3D mature transcription signals from a HeLa cell using the  $\beta$ Act gene. The single molecule RNA tomograms correspond to the cell that was shown in Supplementary Figure 43.

**Supplementary Movie 13.** Label free IBT reconstruction of a tissue using  $^{31}\text{P}$  (primarily chromatin, blue),  $^{34}\text{S}$  (proteins, green),  $^{12}\text{C}$  (cyan),  $^{37}\text{Cl}$  (red), and  $^{14}\text{N}$  (yellow) in individual CD3+ T cells from a lymph node biopsy core of a T cell lymphoblastic lymphoma patient. The 3D tissue images show the cells that was presented in Supplementary Figure 46.

**Supplementary Movie 14.** IBT reconstruction of a cancer-immune Interface using (CD45+, label:  $^{169}\text{Tm}$ ) and cancer cells (CK19, label:  $^{141}\text{Pr}$ ) in a biopsy core from a cholangiocellular carcinoma. The 3D cellular data corresponds to images that were shown in Supplementary Figure 47.

**Supplementary Movie 15.** Secondary ion beam localization (SILM) working principle is illustrated. A comparison of STORM reconstructed subcellular microtubule patterns and SILM reconstructed DNA images in a HeLa cell was provided. A table was shown for distinct features of STORM and SILM with theoretical localization limits.

**Supplementary Software 1.** Deconv-IBT analysis package that is used to process the 3D IBT DATA from Raw SIMS Scans. Example data-sets were provided in the form of chromatin and nanotags. The codes were implemented in MATLAB and Python.

**Supplementary Software 2.** SILM-IBT analysis package that is used to process the 3D IBT DATA from Raw SIMS Scans. Example data-sets were included as ion image stacks. The codes were processed in Python.

**Supplementary Software 3.** Deep Learning-IBT analysis package that is used to process the 3D IBT DATA from Raw SIMS Scans in comparison to SILM-IBT reconstructed images. Example data-sets were included as raw and high precision images. The codes were analyzed in Python.

**Supplementary Software 4.** 3D spatial clustering of IBT data by k-means that is used to process the reconstructed 3D IBT DATA (Deconv-IBT, SILM-IBT, DL-IBT). The code was implemented in Python.

**Supplementary Software 5.** R quantification of IBT voxel data cubes using heatmap, bar plots with significance, correlation maps, and association circular representations. The extracted excel files from IBT data was analyzed by R-studio interface.

**Supplementary Software 6.** Resolution analysis of edge scans before and after DECONV-IBT using ERF-function fits in MATLAB.
